# Supplementary material for: A Novel Dimer-Tetramer Transition Captured by the Crystal Structure of the HIV-1 Nef
Source: PLOS journal article supplement (doi:10.1371/journal.pone.0026629), 2011-11-02

**Supplementary Figure 2**

SDS-PAGE gel of crushed HIV-1 Nef crystals (*right*) run along with the molecular weight marker from *Fermentas*. A sample gel from a purification run is shown on the *left* for comparison. Lane L5 corresponds to the purified eluted protein from the Ni-NTA column while lanes L1-L4 correspond to the other stages of purification including the wash cycles.

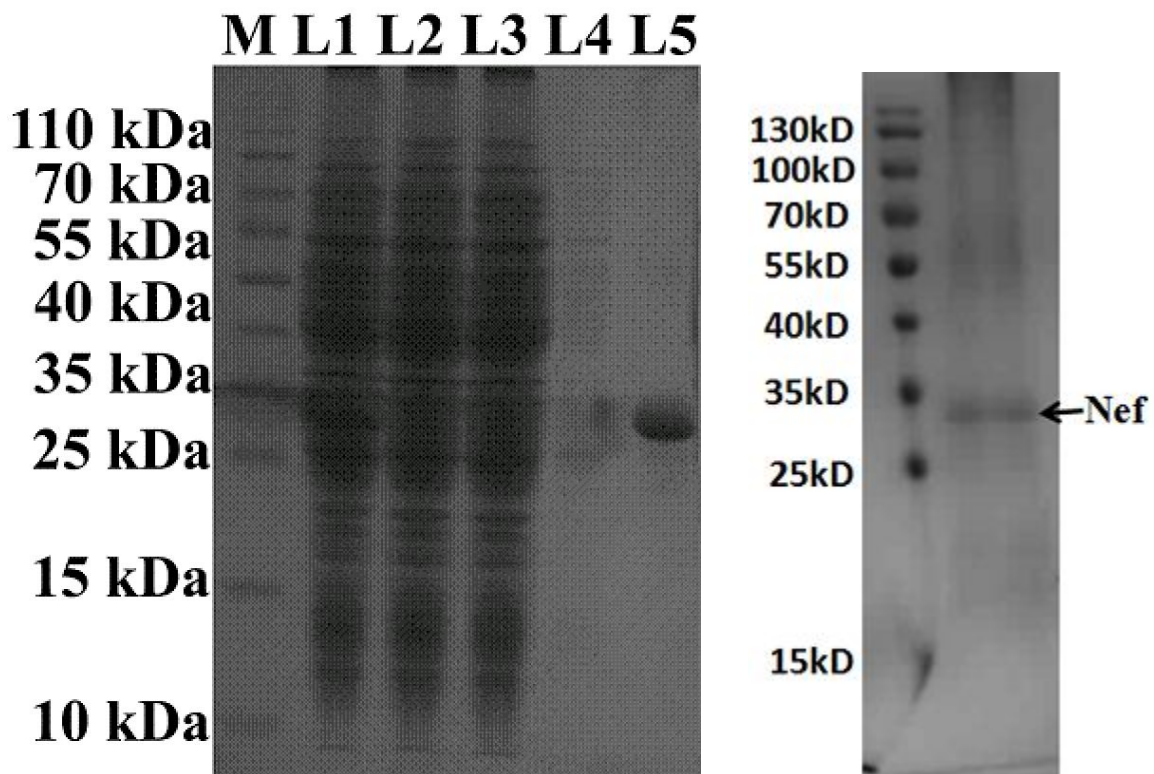

Supplement: S2 (10.1371/journal.pone.0026629.s002) [file journal.pone.0026629.s002]
